# Supplementary material
Source: PubMed Central journal article supplement (PMC8458488)
Supplement: NIHMS1636593-supplement-1.pdf [file NIHMS1636593-supplement-1.pdf]

### Supplemental Online Materials

These supplemental online materials are for the article, titled *Trait Attributions and Threat Appraisals Explain Why an Entity Theory of Personality Predicts Greater Internalizing Symptoms During Adolescence*. These materials are intended to appear only on a website linked to the article. The overall structure of the online supplemental materials is as follow:

1. Page S2: Implicit Theories of Personality Measures and Standardized Factor Loadings
2. Page S3: Intercorrelations among Key Variables (Study 1)
3. Page S4: The Association Between an Entity Theory of Personality and Fixed Trait Attribution About the Self by Each Sample
4. Page S5: The Path Coefficients for the Association of Entity Theory of Personality to Internalizing Symptoms after Controlling for Gender
5. Pages S6-S8: Study 2 Modeling syntax
6. Page S9: Supplemental References

### Implicit Theories of Personality Measures and Standardized Factor Loadings

| Item                                                                                     | Study  | Study  |
|------------------------------------------------------------------------------------------|--------|--------|
|                                                                                          | 1b     | 2      |
| 1. You can't change people who are jerks in school.                                      | .58*** | .69*** |
| 2. Some people are just jerks, and not much can be done to change them.                  | .70*** | .72*** |
| 3. Bullies and victims are types of people that really can't be changed.                 | .73*** | .72*** |
| 4. Bullies can try acting nice, but deep down they're just bullies.                      | .63*** | .55*** |
| 5. You can't change whether or not people respect you in school.                         | .52*** | .51*** |
| 6. Some people are just not cool, and not much can be done to change that.               | .56*** | .63*** |
| 7. Popular people and unpopular people are types of people that really can't be changed. | .52*** | .53*** |
| 8. Some people in high school will never be respected by anyone.                         | .43*** | .56*** |

**Intercorrelations among Key Variables (Study 1)**

|                                  | 1      | 2      | 3      | <i>N</i> (Study 1a) |
|----------------------------------|--------|--------|--------|---------------------|
| 1. Entity theory of personality  | ---    | .18*** | .14*** | 3,282               |
| 2. Depressive symptoms           | .28*** | ---    | .59*** | 3,406               |
| 3. Global psychological distress | .20*** | .66*** | ---    | 2,994               |
| <i>N</i> (Study 1b)              | 3,051  | 3,046  | 3,018  | ---                 |
| Mean (Study 1b)                  | 2.95   | 0.40   | 2.64   | ---                 |
| Standard deviation (Study 1b)    | 0.92   | 0.31   | 0.87   | ---                 |

*Note.* Variables are standardized in Study 1 with means of 0 and standard deviations of 1.

Correlations for Study 1a/Study 1b are shown above/below diagonal.

\*  $p < .05$ . \*\*  $p < .01$ . \*\*\*  $p < .001$ .

**The Association Between an Entity Theory of Personality and  
Fixed Trait Attribution About the Self**

| Sample | Attribution Measure | <i>r</i> | <i>n</i> |
|--------|---------------------|----------|----------|
| 1      | Recall, Scenario    | .26**    | 150      |
| 2      | Cyberball           | .25***   | 303      |
| 3      | Cyberball           | .23***   | 211      |
| 4      | Social media        | .16**    | 251      |
| 5      | Social media        | .16      | 84       |
| 6      | Social media        | .25*     | 62       |
| 7      | Social media        | .17**    | 320      |
| 8      | Scenario            | .14***   | 2,877    |

*Note.* Recall = Attribution about recalled personal experiences of peer conflict. Scenario = Attribution about a hypothetical scenario of peer conflict. Cyberball = Attribution about social exclusion during the online Cyberball game (e.g., Williams & Jarvis, 2006). Social media = Attribution about few “likes” on an experimental social media interaction (e.g., Lee et al., 2019).

\*  $p < .05$ . \*\*  $p < .01$ . \*\*\*  $p < .001$ .

**The Path Coefficients for the Association of Entity Theory of Personality to  
Internalizing Symptoms After Controlling for Gender**

| Variable                                     | <i>b</i> | <i>SE</i> |
|----------------------------------------------|----------|-----------|
| <b>Person-level (level 2)</b>                |          |           |
| Internalizing symptoms                       |          |           |
| Threat appraisals                            | .12***   | .03       |
| Female                                       | .05*     | .02       |
| Baseline internalizing symptoms              | .15***   | .02       |
| Threat appraisals                            |          |           |
| Fixed trait attribution                      | .25***   | .05       |
| Female                                       | -.05     | .09       |
| Baseline internalizing symptoms <sup>a</sup> | .39***   | .05       |
| Fixed trait attribution                      |          |           |
| Entity theory                                | .24**    | .08       |
| Female                                       | .21      | .13       |
| Baseline internalizing symptoms <sup>a</sup> | .33***   | .06       |
| <b>Day-level (level 1)</b>                   |          |           |
| Threat appraisals                            |          |           |
| Daily stressor intensity                     | .31***   | .08       |
| Random slope                                 | .07*     | .03       |
| × fixed trait attribution                    |          |           |

*Note.*  $N = 474$  (2,998 daily reports). Female: 0 = male, 1 = female. Standardized coefficients were not calculated because the random effects model assumes no single variance/covariance matrix for the entire sample. Dummy-coded day variables were included as covariates (Reference day = Monday) to control for the potential day-of-the week effect (Chow, Ram, Boker, Fujita, & Clore, 2005). <sup>a</sup>covariance path

+  $p < .10$ . \*  $p < .05$ . \*\*  $p < .01$ . \*\*\*  $p < .001$ .

## IMPLICIT THEORIES AND INTERNALIZING SYMPTOMS

6

**Modeling Syntax****TITLE: Multilevel Model Syntax**

DATA: FILE IS daily data long.dat;

VARIABLE: NAMES ARE

```

school      !school ID
nid         !student ID
gender
itp1       !an entity theory personality item 1
itp2       !an entity theory personality item 2
itp3       !an entity theory personality item 3
itp4       !an entity theory personality item 4
itp5       !an entity theory personality item 5
itp6       !an entity theory personality item 6
itp7       !an entity theory personality item 7
itp8       !an entity theory personality item 8
str        !intensity of daily stressor
fixself     !fixed trait attribution about the self
negcontrol_r !daily threat appraisal item 1 (reverse coded)
neghelpless !daily threat appraisal item 2
cditotal    !depressive symptoms total scores
psstotal    !global psychological stress total scores
INTb       !baseline internalizing symptoms
Tuesday
Wednesday
Thursday
Friday
;
```

USEVARIABLES ARE

!Person-level var:

```

  itp1 itp2 itp3 itp4
  itp5 itp6 itp7 itp8
  fixself
  cditotal
  psstotal
  INTb
```

!Day-level var:

```

  str
  negcontrol_r
  neghelpless
  Tuesday
  Wednesday
  Thursday
  Friday
;
```

WITHIN =

```

  str
```

## IMPLICIT THEORIES AND INTERNALIZING SYMPTOMS

7

```

Tuesday
Wednesday
Thursday
Friday
;

BETWEEN =
  itp1 itp2 itp3 itp4
  itp5 itp6 itp7 itp8
  fixself
  cditotal
  psstotal
  INTb
;

CLUSTER IS nid;

MISSING ARE ALL (-99999);

DEFINE: CENTER str (GROUPMEAN);
         CENTER itp1 itp2 itp3 itp4
              itp5 itp6 itp7 itp8 INTb
              (GRANDMEAN);

ANALYSIS:
  ESTIMATOR=MLR;
  TYPE=TWOLEVEL RANDOM;

MODEL:
%WITHIN%
!day-level measurement model;
  TAPPw BY negcontrol_r neghelpless;

!day-level structural model:
  s | TAPPw ON str;
  TAPPw ON Tuesday
      Wednesday
      Thursday
      Friday;

%BETWEEN%
!person-level measurement mode:
  ITP BY itp1 itp2 itp3 itp4
        itp5 itp6 itp7 itp8;

  TAPPb BY negcontrol_r neghelpless;

  INT BY cditotal psstotal;

  itp1 WITH itp2;
  itp6 WITH itp7;

```

## IMPLICIT THEORIES AND INTERNALIZING SYMPTOMS

8

!person-level structural model:

INT ON TAPPb (a)

INTb;

TAPPb ON fixself (b);

fixself ON ITP (c);

s ON fixself;

ITP WITH INTb;

fixself WITH INTb;

TAPPb WITH INTb;

MODEL CONSTRAINT:

NEW(abc);

abc=a\*b\*c;

OUTPUT: SAMPSTAT CINTERVAL;



### Supplemental References

- Chow, S. M., Ram, N., Boker, S. M., Fujita, F., & Clore, G. (2005). Emotion as a thermostat: representing emotion regulation using a damped oscillator model. *Emotion, 5*, 208-225.  
<https://doi.org/10.1037/1528-3542.5.2.208>
- Lee, H. Y., Jamieson, J. P., Reis, H. T., Beevers, C. G., Josephs, R. A., Mullarkey, M. C., ... & Yeager, D. S. (in press). Getting fewer “likes” than others on social media elicits emotional distress among victimized adolescents. *Child Development*.
- Williams, K. D., & Jarvis, B. (2006). Cyberball: A program for use in research on interpersonal ostracism and acceptance. *Behavior Research Methods, 38*, 174-180.  
<https://doi.org/10.3758/BF03192765>
